# Supplementary material for: Senescent cells develop PDK4-dependent hypercatabolism and produce lactate to promote cancer resistance and aging
Source: Research Square preprint supplement (doi:10.21203/rs.3.rs-2485584/v1), 2023-01-27
Supplement: Supplementary file 1 [file da4f1f19aa17de079449c08a.docx]

**Extended Data Fig. 1. Profiling of global gene expression and senescence induction of PSC27 cells upon *in vitro* treatment.**

1. Heatmap depiction of expression changes for transcripts up- or downregulated in PSC27 stromal cells after induction of senescence with individual agents.
2. Senescence assessment with SA-β-Gal staining of human stromal cells that experienced either lentiviral transduction (p16, RAS) or anticancer treatments (RS, BLEO, RAD and HP) as indicated. Representative images are shown. Scale bars, 50 μm.
3. Comparative statistics of senescence positivity upon appraisal with SA-β-Gal staining of stromal cells as described in (**b**).
4. Comparative statistics of senescence induction upon evaluation of BrdU staining positivity of PSC27 cells.
5. Immunoblot analysis of PDK4 induction in PSC27, HFL1 and HBF1203 cell lines. In each line, cells were exposed to bleomycin (BLEO), mitoxantrone (MIT) and ionizing radiation (RAD). β-actin, loading control.

Data are representative of 3 (**a**, **b**) or 5 (**c**, **d**) independent experiments. *P* values were calculated by Student’s *t*-test (**c**, **d**). **** *P* < 0.0001.

**Extended Data Fig. 2. PDK4 is expressed in human prostate stroma after chemotherapy and negatively correlated with posttreatment survival.**

1. Representative images of PDK4 expression in biospecimens of human prostate cancer patients after histological examination. Left, immunohistochemical (IHC) staining. Right, hematoxylin and eosin (HE) staining. Left, untreated; right, chemo-treated. Rectangular regions selected in the upper images *per* staining are amplified into the lower images. Scale bars, 100 μm.
2. Pathological assessment of stromal PDK4 expression in PCa samples (untreated, 42 patients; treated, 48 patients). Patients were pathologically assigned into 4 categories *per* IHC staining intensity of PDK4 in the stroma. 1, negative; 2, weak; 3, moderate; 4, strong expression. Left, statistical comparison. Right, representative images of each category regarding PDK4 signals. EL, expression level. Scale bar, 100 µm.
3. Boxplot summary of PDK4 transcript expression by qRT-PCR analysis upon laser capture microdissection (LCM) of cells from tumor and stroma, respectively. Signals normalized to the lowest value in the untreated epithelium group, with comparison performed between untreated (42 patients) and treated (48) samples *per* cell lineage. For cells of either epithelium or stroma origin, samples from 10 patients out of untreated and treated groups were randomly selected for further analysis and parallel comparison.
4. Comparative analysis of PDK4 expression at transcription level between epithelial cells collected before and after chemotherapy. Each dot represents an individual patient, with the data of “before” and “after” connected to allow direct assessment of PDK4 induction in the same individual patient.
5. Comparative analysis of PDK4 expression at transcription level between stromal cells collected before and after chemotherapy. Presentation follows the manner described in (**d**).
6. Pathological correlation between PDK4, CXCL8, WNT16B, p16INK4a and p21CIP1 in the stroma of PCa patients after treatment. Scores were from the assessment of molecule-specific IHC staining, with expression levels colored to reflect low (blue) via modest (turquoise) and fair (yellow) to high (red) signal intensity. Columns represent individual patients, rows different factors. Totally 48 patients treated by chemotherapy were analyzed, with scores of each patient averaged from 3 independent pathological readings.
7. Kaplan-Meier analysis of PCa patients. Disease free survival (DFS) stratified according to PDK4 expression (low, average score < 2, blue line, n = 22; high, average score ≥ 2, purple line, n = 26). DFS represents the length (months) of period calculated from the date of PCa diagnosis to the point of first time disease relapse. Survival curves generated according to the Kaplan–Meier method. HR, hazard ratio.

Data in all bar plots are shown as mean ± SD and representative of 3 biological replicates. *P* values were calculated by Student’s *t*-test (**c**, **d**, **e**), two-way ANOVA (**b**) and log-rank (Mantel-Cox) test (**g**). ^, *P* > 0.05. *** *P* < 0.001. **** *P* < 0.0001.

**Extended Data Fig. 3. Senescent cells manifest glucose metabolic properties distinct from their normal and cancer counterparts.**

**a-g.** Analysis of gas chromatography-mass spectrometry (GC-MS) to determine isotope labeling of individual specific metabolites. The retrieved data comprised mass intensities for the lightest isotopomer (without any heavy isotopes, M0) and isotopomers with increasing unit mass (up to M6) relative to M0. These mass distributions were normalized by dividing by the sum of M0 to M6 and corrected for the natural abundance of heavy isotopes of the elements H, N, O, Si and C, with matrix-based probabilistic methods as described in the Methods section, and implemented in MATLAB.

1. Statistic comparison of citrate M2 and pyruvate M3 in control and senescent cells induced by BLEO treatment.
2. ECAR profile of stromal cells was determined using a Glycolysis Stress Test kit.
3. Measurement of the glycolyic capacity of stromal cells. Data derived from ECAR assays and presented in mpH/min.
4. Assessment of the glycolytic reserve of stromal cells. Data derived from ECAR assays and presented in mpH/min.
5. Principal component analysis (PCA) of global metabolites assayed by the metabolite profiling approaches.
6. Quantitative RT-PCR to examine the expression of glucose uptake and metabolism-associated genes after PSC27 cells were subject to individual treatment as indicated.
7. Evaluation of cellular senescence of PSC27 cells by SA-β-Gal staining. Left, comparative statistics. Right, representative images. Scale bar, 100 μm.
8. Immunoblot analysis of PDK4, CXCL8, IL6 expression in stromal cells expressing exogenous PDK4. Vector, control cells transduced with an empty vector. PDK4, cells transduced with the PDK4 construct.

Data in all bar plots are shown as mean ± SD and representative of 3 biological replicates. *P* values were calculated by Student’s *t*-test. ^, *P* > 0.05. * *P* < 0.05. ** *P* < 0.01. *** *P* < 0.001. **** *P* < 0.0001.

**Extended Data Fig. 4. Senescent stromal cells reprogram glucose metabolism through a PDK4-mediated switch to glycolysis.**

1. Measurement of lactate production by comparing proliferating and senescent PSC27 cells as well as stromal and typical PCa lines including PC3 and DU145.
2. OCR assessment of human stromal cells with an XF24 extracellular flux analyzer.
3. Examination of ATP produced by PSC27, PC3 and DU145 upon senescence induced by bleomycin (BLEO).
4. Evaluation of basal respiration of human prostate stromal and cancer cell lines.
5. Appraisal of maximal respiration of human prostate stromal and cancer cell lines.
6. Assessment of non-mitochondrial oxygen consumption of human prostate stromal and cancer cell lines.
7. Glucose uptake measurement of PSC27 cells transduced with a PDK4 construct or depleted of PDK4 *via* small hairpin RNA. OE, overexpression. SCR, scramble control.
8. Lactate production assessment of PSC27 sublines as described in (**g**).
9. Relative TG production assay of PSC27 sublines as described in (**g**).
10. Determination of the pH of conditioned media of PSC27 sublines as described in (**g**).
11. Glucose uptake measurement of PSC27 cells upon BLEO-induced senescence (TIS) in the presence or absence of PDK4, the latter mediated by shRNA knockdown.
12. Lactate production measurement of PSC27 cells as described in (**k**).
13. Relative TG production assay of PSC27 cells as described in (**k**).
14. Determination of the pH of conditioned media of PSC27 cells as described in (k).
15. Comparative RT-PCR assay of PDK4, CXCL8, glycolysis-related genes (Glut1, MCT4, HIF1α, PGK1 and PGI) as well as and TCA-related genes (CS, IDH2, IDH3A and IDH3B) expression in human stromal cells 7 d after treatments performed as indicated.

**Extended Data Fig. 5. PDK4 transduction in stromal cells induces substantial changes of PCa cell expression and promotes *in vitro* malignancy.**

1. Graphical visualization of pathways by GO profiling (pie chart depicting biological processes). Those significantly enriched genes in the upregulated list were sorted according to their fold change in DU145 cells exposed to the CM of PSC27-PDK4 stromal cells.
2. Graphical visualization of pathways by GO profiling in a manner resembling that represented in (**a**). Those significantly enriched genes in the upregulated list were sorted according to their fold change in M12 cells exposed to the CM of PSC27-PDK4 stromal cells.
3. Appraisal of the proliferation capacity of PCa lines upon exposure to the CM of PSC27-PDK4 stromal cells. The HTR2B inhibitor LY 266097 was applied to media as a drug treatment control. HTR2B knockdown was performed through shRNA-encoding constructs.
4. Measurement of the migration ability of PCa lines upon exposure to the CM of PSC27-PDK4 stromal cells. The HTR2B inhibitor LY 266097 was applied to media as a drug treatment control. HTR2B knockdown was performed through shRNA-encoding constructs.
5. Examination of the invasiveness of PCa lines upon exposure to the CM of PSC27-PDK4 stromal cells. The HTR2B inhibitor LY 266097 was applied to media as a drug treatment control. HTR2B knockdown was performed through shRNA-encoding constructs.
6. Determination of the resistance of PCa lines to MIT upon exposure to the CM of PSC27-PDK4 stromal cells. MIT, mitoxantrone, a chemotherapeutic agent applied at the IC50 concentration *per* cell line established prior to the assay. HTR2B knockdown was performed through shRNA-encoding constructs.
7. Dose-response curves (non-linear regression/curve fit) plotted from MIT-based viability assays of PC3 exposed to the CM of PSC27 (BLEO) or PSC27-PDK4 cells and treated by a range of concentrations of MIT. HTR2B knockdown was performed through shRNA-encoding constructs.

Data in all bar plots are shown as mean ± SD. Data in **c-g** are representative of 3 independent experiments. All *P* values were calculated by Student’s *t*-tests. ^, *P* > 0.05. *, *P* < 0.05. **, *P* < 0.01. ***, *P* < 0.001. ****, *P* < 0.0001.

**Extended Data Fig. 6. Presentation of the metabolic landscape of cancer cells upon uptake of exogenous lactate through profiling TCA-associated metabolites.**

1. Partial metabolic profiling (glycolysis) of recipient prostate cancer cells (PC3) exposed to exogenous lactate pre-labeled with the stable isotope tracer [U-13C6]. Results from gas chromatography-mass spectrometry (GC-MS) analysis of metabolites including lactate, pyruvate, alanine, citrate, glutamine, α-KG, succinate, fumarate, malate and aspartate are shown. Syrosingopine, a dual inhibitor of lactate transporters including MCT1 and MCT4.
2. A partial metabolic profiling (glycolysis) of recipient breast cancer cells (MDA-MB-231) exposed to exogenous lactate pre-labeled with the stable isotope tracer [U-13C6]. Results derived from cell treatments and gas chromatography-mass spectrometry (GC-MS) analysis of metabolites as indicated in (**a**).
3. A landscape map showing the overall profile of glucose metabolism-associated catabolic metabolites in PC3 and MDA-MB-231 cells upon uptake of [U-13C6]-labelled lactate in culture.
4. Immunoblot assessment of MCT1 and MCT4 expression in PC3 cells upon exposure to [U-13C6]-labelled lactate in culture. β-actin, loading control.
5. Immunoblot assessment of MCT1 and MCT4 expression in MDA-MB-231 cells upon exposure to [U-13C6]-labelled lactate in culture. β-actin, loading control.

Data in all bar plots are shown as mean ± SD. Data in **a-c** are representative of 3 independent experiments. All *P* values were calculated by Student’s *t*-tests. *, *P* < 0.05. **, *P* < 0.01. ***, *P* < 0.001. ****, *P* < 0.0001.

**Extended Data Fig. 7. Schematic design of preclinical trial and comparative analysis of gene expression *in vivo*.**

1. Statistics of tumor end volumes. PC3 cells were xenografted alone or together with PSC27 to the hind flank of animals, with tumor volumes measured at the end of an 8-week period.
2. Cancer cells (PC3) alone or alongside stromal cells (PSC27) were inoculated subcutaneously to NOD/SCID males 2 weeks before chemotherapy. MIT and PDK4-IN were delivered *via* intravenous injection on the 1 st day of each week starting from the 3 rd week, then given every other week, totally 3 doses. At the end of 8 weeks mice were sacrificed, with tumor volume measured and tissues assessed.
3. Transcript analysis of the canonical SASP factor AREG, senescence marker p16INK4a and p21CIP1, and PDK4 expression in epithelial and stromal cells, respectively. Individual cell types isolated from tumor tissues *via* LCM. Data are representative of 3 biological replicates (n = 10 animals *per* group). Datasets are displayed as box-and-whisker plots, where a box extends from the 25th to 75th percentile with the median shown as a line in the middle, with whiskers indicating smallest and largest values. Note, the group measured as the lowest value was used as the normalization baseline *per* factor. *P* values were calculated by two-sided t-test.
4. Statistics of tumor end volumes. LNCaP cells were xenografted together with PSC27 to the hind flank of animals, with MIT and/or PDK4-IN delivered *via* intravenous injection in a manner resembling that of PC3/PSC27 regimen. Tumor volumes measured at the end of an 8-week period.
5. Statistics of tumor end volumes. 22Rv1 cells were xenografted together with PSC27 to the hind flank of animals, with MIT and/or PDK4-IN delivered *via* intravenous injection in a manner resembling that of PC3/PSC27 regimen. Tumor volumes measured at the end of an 8-week period.
6. Statistics of tumor end volumes. MDA-MB-231 (MDA) cells were xenografted together with HBF1203 to the hind flank of animals, with DOX and/or PDK4-IN delivered *via* intravenous injection in a manner resembling that of PC3/PSC27 regimen. Tumor volumes measured at the end of an 8-week period.

Data in **a, c, d, e** and **f** are shown as mean ± SD and representative of 3 independent experiments. MIT, mitoxantrone. DOX, doxorubicin. For each dataset, n = 10 *per* treatment arm. All *P* values were calculated by Student’s *t*-tests. ^, *P* > 0.05. *, *P* < 0.05. **, *P* < 0.01. ***, *P* < 0.001. ****, *P* < 0.0001.

**Extended Data Fig. 8. Phenotypic characterization of PDK4-specific targeting on the SASP expression, ROS production and DNA damage intensity.**

1. Transcript-based quantitative examination of typical SASP factors expressed by PSC27 cells upon treatment with the genotoxic agent BLEO and/or PDK4 inhibitor PDK4-IN. Data from qRT-PCR were normalized to the CTRL group *per* factor.
2. Measurement of ROS levels with DCFH-DA, a cell permeable fluorescent probe sensitive to alterations in cellular redox state. PSC27 cells were allowed to reach replicative exhaustion (RS), engineered to overexpress *HRasG12V* (OIS) or subject to genotoxic stress by doxorubicin (TIS). ROS assays were performed 2-3 d after cells were determined to have entered senescence stage. Scale bar, 10 μm.
3. Relative quantification and statistical comparison of DCF signals in each sample as described in (**b**).
4. Comparative statistics of DDR intensity in PSC27 cells undergoing RS and/or treated by PDK4-IN. DDR were classified into four sub-categories including 0 foci, 1-3 foci, 4-10 foci and >10 foci *per* cell.
5. Comparative statistics of DDR intensity in PSC27 cells undergoing *HRasG12V*-induced OIS and/or treated by PDK4-IN.
6. Comparative statistics of DDR intensity in PSC27 cells undergoing DOX-induced TIS and/or treated by PDK4-IN.
7. Quantitative RT-PCR-based transcript assay of representative SASP factors expressed by PSC27 cells undergoing RS and/or upon treatment with the PDK4 inhibitor PDK4-IN. Data from qRT-PCR were normalized to the CTRL group *per* factor.
8. Quantitative RT-PCR-based transcript assay of representative SASP factors expressed by PSC27 cells upon senescence induced by the oncogene *HRasG12V* and/or treatment with the PDK4 inhibitor PDK4-IN. Data from qRT-PCR were normalized to the CTRL group *per* factor.
9. Quantitative RT-PCR-based transcript assay of representative SASP factors expressed by PSC27 cells upon senescence induced by the genotoxic agent DOX and/or treatment with the PDK4 inhibitor PDK4-IN. Data from qRT-PCR were normalized to the CTRL group *per* factor.

Data in all bar plots are shown as mean ± SD. Data in **a-i** are representative of 3 independent experiments. All *P* values were calculated by Student’s *t*-tests. ^, *P* > 0.05, *, *P* < 0.05. **, *P* < 0.01. ***, *P* < 0.001. ****, *P* < 0.0001.

**Extended Data Fig. 9. Preclinical profiling of ROS generation, liver physiological index, genome-wide expression and physical function of aged mice.**

1. Immunoblot analysis of NOX1 expression across several organ types in young *vs* aged mice. Y, young. A, aged. Myo, myocardium. GAPDH, loading control.
2. Measurement of ROS levels in individual organs described in (**a**) with DCFH-DA, a cell permeable fluorescent probe sensitive to alterations in cellular redox state. Left, representative images. Right, statistical comparison. Scale bar, 20 μm.
3. Heatmap depicting the expression pattern of genes significantly upregulated upon BLEO-induced senescence but subject to counteraction by PDK4-IN treatment. Red stars, representative SASP factors.
4. GSEA plot of a significant gene set in the SASP spectrum. FDR, false discovery rate; NES, normalized enrichment score.
5. The serum levels of alanine transaminase (ALT) from young mice and their aged counterparts that received biweekly treatment of vehicle, PDK4-IN or PCC1 at 20 months of age for 4 consecutive months.
6. The serum levels of aspartate transaminase (AST) from mice as described in (**e**).
7. The serum levels of lactate dehydrogenase (LDH) from mice as described in (**e**).
8. Measurement of body weights for mice as described in (**e**).
9. Assessment of daily food intake for animals as described in (**e**).
10. Whole-life survival curves of C57BL/6J mice treated biweekly with vehicle (n = 68; 37 males, 31 females), PDK4-IN (n = 66; 33 males, 33 females) or PCC1 (n =67; 35 males, 32 females) starting at 24-27 months of age.

**k-l.** Maximal walking speed (**k**) and hanging endurance (**l**) averaged over the last 2 months of life.

**m.** Appraisal of lifespan for the longest living mice (top 20) in each group.

Male mice in each group were adapted in 3 (young) or 4 (aged) independent cages. For preclinical assays, n = 10/group for **e**-**i** and **k**-**m**. Data in **a**-**b, e**-**i** and **k**-**m** are representative of 3 independent experiments. *P* values were calculated by Student’s *t*-test (**b**, **e**-**i**, **k**-**m**) and log-rank (Mantel-Cox) test (**j**). ^, *P* > 0.05. *, *P* < 0.05. **, *P* < 0.01. ***, *P* < 0.001. ****, *P* < 0.0001.

**Extended Data Fig. 10. Late life PDK4 targeting does not change the cause of death, but restrains the SASP and minimizes oxidative stress.**

**a**-**b.** Pie charts profiling the ultimate causes of death of C57BL/6J mice (males and females) that received vehicle (**a**) or PDK4-IN (**b**) biweekly treatment starting from 24-27 months of age. Note, there was no significant difference between vehicle- and PDK4-IN-treated groups upon analysis using either Chi-square or Fisher’s exact tests.

**c.** Overall disease burden of mice at death. For both sexes, n = 60 per arm. For males (♂), *n* = 31 for vehicle, *n* = 33 for PDK4-IN and *n* = 32 for PCC1. For females (♀), *n* = 29 for vehicle, *n* = 27 for PDK4-IN and *n* = 28 for PCC1.

**d**. Tumour burden of animals at death. For both sexes, n = 30 per arm. For males (♂), *n* = 16 for vehicle, *n* = 17 for PDK4-IN and *n* = 15 for PCC1. For females (♀), *n* = 14 for vehicle, *n* = 13 for PDK4-IN and *n* = 15 for PCC1.

**e.** qRT-PCR profiling of the SASP and senescence marker expression in liver tissues of young (6-month-old, untreated), aged (24-27-month-old) vehicle-treated and aged (24-27-month-old) PDK4-IN-treated animals, respectively.

**f**-**h.** Measurement of circulating levels of hallmark SASP factors IL6 (**f**), AREG (**g**) and CSF3 (**h**) in mouse serum by ELISA assays.

**i.** Quantitative measurement of the SASP and senescence marker expression in CD3+ peripheral T cells of experimental mice described in **e**-**h**.

**j.** Assessment of 4-hydroxynonenal (HNE) adducts, a marker of lipid peroxidation and oxidative stress by ELISA measurement with tissue lysates of the liver.

**k.** Determination of the ratio of reduced (GSH) to oxidized (GSSG) glutathione measured as an index oxidative stress.

Data are shown as mean ± SD and derive from 3 biological replicates (*n* = 3 independent assaysfor **e**-**k**). *P* values were calculated by two-sided *t*-test. ^, *P* > 0.05. *, *P* < 0.05. **, *P* < 0.01. ***, *P* < 0.001. ****, *P* < 0.0001.
